# Supplementary material
Source: PubMed Central journal article supplement (PMC3539684)
Supplement: supp_1103721_12-03721_S1_Tab1.pdf [file supp_1103721_12-03721_S1_Tab1.pdf]

Supplementary Figure S1

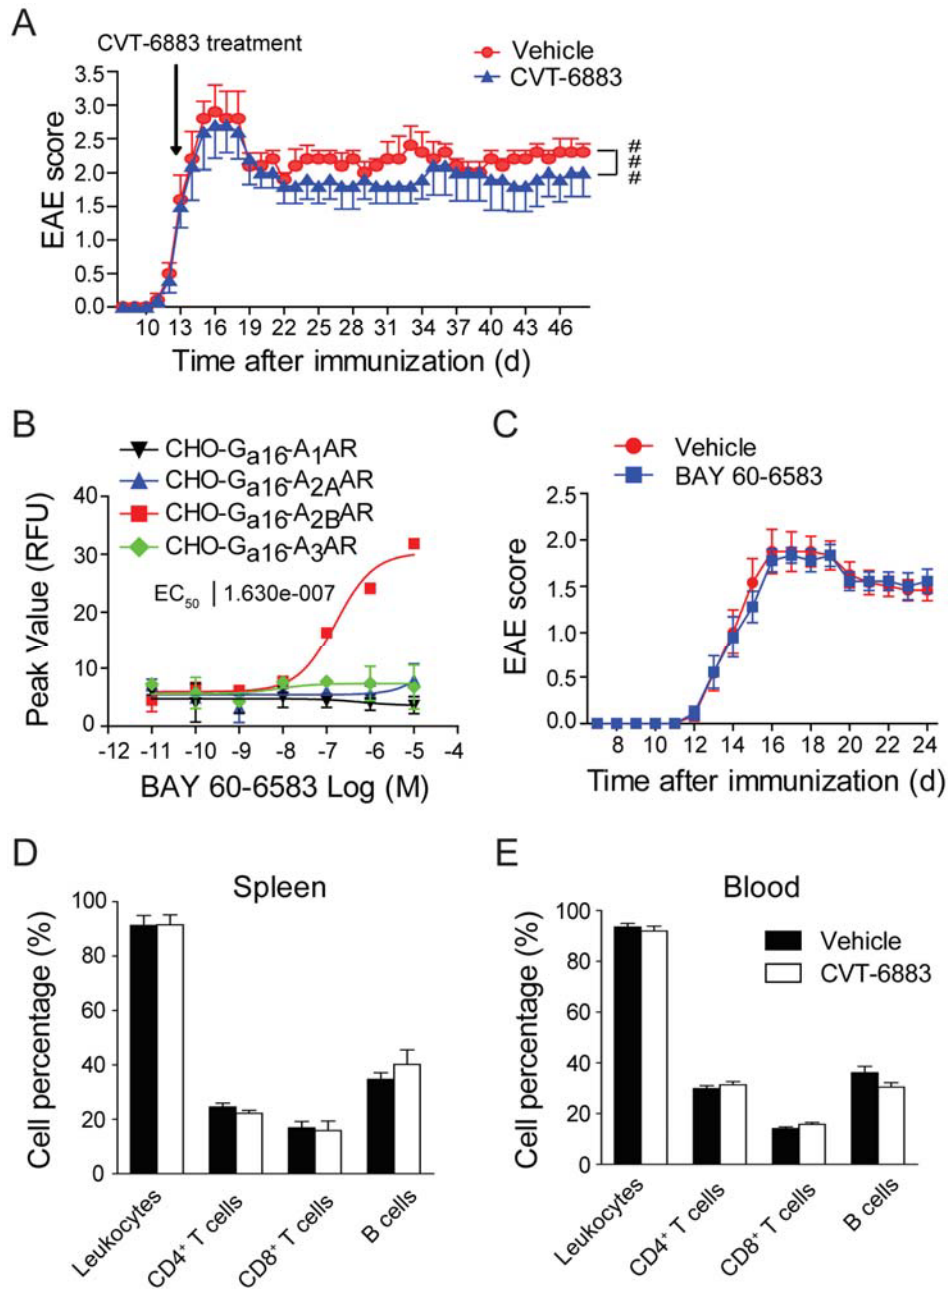

(A) CVT-6883 (3 mg/kg) was given once daily via i.p. injection after the onset of EAE (Day 13 PI) till the end of the experiment (Day 48 PI) and clinical scores were collected every day. Data are mean  $\pm$  SEM (n=5). ###*p* < 0.001 (two-way ANOVA test). (B) Calcium mobilization assay. Chinese hamster ovary (CHO) cells overexpressing G<sub>α16</sub> and four indicated adenosine receptors were loaded with fluo4-AM and stimulated with BAY 60-6583. Calcium responses were recorded. Data are mean  $\pm$  SEM (n=3). (C) BAY 60-6583 (2 mg/kg) was given once daily via i.p. injection from Day 3 PI and clinical scores were collected every day. Data are mean  $\pm$  SEM (Vehicle, n=12; BAY 60-6583, n=9). (D and E) Surface staining of CD45<sup>+</sup> cells (leukocytes), CD4<sup>+</sup> T cells, CD8<sup>+</sup> T cells and B220<sup>+</sup> cells (B cells) isolated from spleen (D) and blood (E) of EAE mice treated with vehicle or CVT-6883. Data represent mean  $\pm$  SEM (n=6).

**Supplementary Table S1**

Real-time PCR primers.

| <b>Human</b>   | <b>Sense (5'-3')</b>   | <b>Anti-sense (5'-3')</b> |
|----------------|------------------------|---------------------------|
| <i>Adora1</i>  | TGCGAGTTTCGAGAAGGTCATC | GAGCTGCTTGCGGATTAGGTA     |
| <i>Adora2a</i> | GCTGGGATCAAGGACAGGG    | TCCCTTTAGAAGGAAAGGCAGT    |
| <i>Adora2b</i> | TCTTCCTCGCCTGCTTCGT    | TTATACCTGAGCGGGACACAGA    |
| <i>Adora3</i>  | TCTTTACCCACGCCTCCATC   | CAATCCCACCAGGAATGACAC     |
| <i>β-actin</i> | CATGTACGTTGCTATCCAGGC  | CTCCTTAATGTCACGCACGAT     |
|                |                        |                           |
| <b>Mouse</b>   | <b>Sense (5'-3')</b>   | <b>Anti-sense (5'-3')</b> |
| <i>Adora1</i>  | TCCTGGCTCTGCTTGCTATTG  | GGCTATCCAGGCTTGTTCCAC     |
| <i>Adora2a</i> | GTCCTCACGCAGAGTTCCATC  | GAATGACAGCACCCAGCAAA      |
| <i>Adora2b</i> | CCTCTTCCTCGCCTGCTTC    | AACGGAGTCAATCCAATGCC      |
| <i>Adora3</i>  | CCGATACCTGCGGGTCAAG    | GGAACGGAAGTGGCACAAA       |
| <i>Il17a</i>   | TTAACTCCCTTGCGCAAAA    | CTTCCCTCCGCATTGACAC       |
| <i>Il17f</i>   | TGCTACTGTTGATGTTGGGAC  | AATGCCCTGGTTTTGGTTGAA     |
| <i>Il22</i>    | GTGAGAAGCTAACGTCCATC   | GTCTACCTCTGGTCTCATGG      |
| <i>Il23r</i>   | ACACTGGGAAGCCTACCTACA  | AGCTTGGACCCATAACCAATACT   |
| <i>Ifng</i>    | ATGAACGCTACACACTGCATC  | CCATCCTTTTGCCAGTTCCTC     |
| <i>Il10</i>    | GCTCTTACTGACTGGCATGAG  | CGCAGCTCTAGGAGCATGTG      |
| <i>Il6</i>     | ACCACGGCCTTCCCTACTTC   | GAATTGCCATTGCACAACCTCTT   |
| <i>β-actin</i> | GGCTGTATTCCCCTCCATCG   | CCAGTTGGTAACAATGCCATGTT   |
